# Supplementary material for: Transcriptional Biomarkers and Immunohistochemistry for Detection of Illicit Dexamethasone Administration in Veal Calves
Source: MDPI journal article supplement (doi:10.3390/foods11121810), 2022-06-20
Supplement: s1 [file s1]

**Supplementary Material Table S1:** Rates (%) of explained and cumulative explained variance by the first six PCs calculated for RQ dataset and RQhisto dataset.

|     | RQ dataset   |                   | RQhisto dataset |                   |
|-----|--------------|-------------------|-----------------|-------------------|
|     | % Expl. Var. | % Cum. Expl. Var. | % Expl. Var.    | % Cum. Expl. Var. |
| PC1 | 35.54        | 35.54             | 35.88           | 35.88             |
| PC2 | 11.26        | 46.81             | 11.46           | 47.34             |
| PC3 | 7.05         | 53.86             | 9.44            | 56.78             |
| PC4 | 6.85         | 60.71             | 7.42            | 64.19             |
| PC5 | 5.36         | 66.08             | 5.18            | 69.38             |
| PC6 | 4.05         | 70.13             | 4.27            | 73.65             |
